# Supplementary material for: Separation of CH4/N2mixtures in metal–organic frameworks with 1D micro-channels
Source: Royal Society of Chemistry journal article supplement (doi:10.1039/c6ra12280a), 2016-01-01
Supplement: c6ra12280a1.pdf [file c6ra12280a1.pdf]

# Electronic Supporting Information

## Separation of CH<sub>4</sub>/N<sub>2</sub> mixtures in metal-organic frameworks with 1D micro-channels

Jiangliang Hu <sup>a,b,c</sup>, Tianjun Sun <sup>a,b,\*</sup>, Xiaowei Liu <sup>a,b,c</sup>, Ya Guo <sup>a,b,c</sup> and Shudong Wang <sup>a,b,\*</sup>

<sup>a</sup> *Dalian Institute of Chemical Physics, Chinese Academy of Sciences, Dalian 116023, Liaoning, China.*

<sup>b</sup> *Dalian National Laboratory for Clean Energy, Dalian 116023, Liaoning, China.*

<sup>c</sup> *University of Chinese Academy of Sciences, Beijing 100039, China.*

1

---

\* Corresponding Authors : Prof. Shudong Wang (wangsd@dicp.ac.cn); Dr. Tianjun Sun (suntianjun@dicp.ac.cn)  
Telephone: +86-411-84379052; Fax: +86-411-84662365

**Table S1** Column specifications and absorbent characteristics

| Sample                                 | loaded amount g | Bulk density / g·cm <sup>-3</sup> | Particle size |
|----------------------------------------|-----------------|-----------------------------------|---------------|
| [Ni <sub>3</sub> (HCOO) <sub>6</sub> ] | 2.53            | 0.80                              | 60-80 mesh    |
| [Cu(INA) <sub>2</sub> ]                | 2.45            | 0.77                              | 60-80 mesh    |
| Al-BDC                                 | 1.75            | 0.55                              | 60-80 mesh    |
| Ni-MOF-74                              | 2.24            | 0.71                              | 60-80 mesh    |

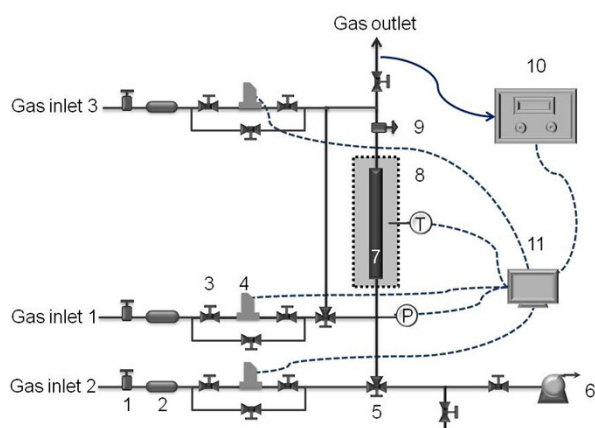

1 pressure reducing regulator; 2 gas purifier; 3 two-way valve; 4 flowmeter; 5 three-way valve; 6 vacuum pump; 7 adsorbent bed; 8 thermostatic chamber; 9 back pressure regulator; 10 mass spectrometer; 11 computer.

**Fig. S1** Schematic diagram of apparatus for break-through measurements of mixed gas adsorption.

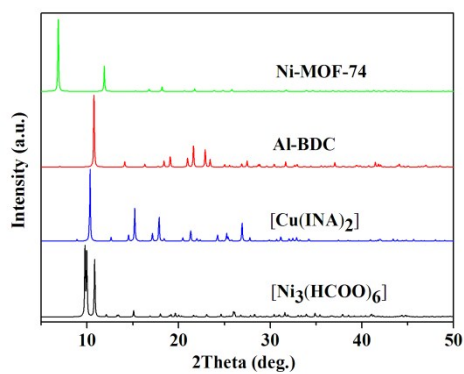

**Fig. S2** Simulated PXRD patterns of selected samples.
